# Supplementary material for: Two-photon brightness of NIR-emitting, atomically precise DNA-stabilized silver nanoclusters
Source: Royal Society of Chemistry journal article supplement (doi:10.1039/d4sc05853d), 2024-12-16
Supplement: d4sc05853d1.pdf [file d4sc05853d1.pdf]

## Supporting Information

# Two-photon brightness of NIR-emitting, atomically precise DNA-stabilized silver nanoclusters

Agata Hajda,<sup>1</sup> Rweetuparna Guha,<sup>2</sup> Stacy Marla Copp,<sup>2,3,4,5</sup> Joanna Olesiak-Bańska<sup>1</sup>

<sup>1</sup> *Institute of Advanced Materials, Wrocław University of Science and Technology, Wrocław, Poland*

<sup>2</sup> *Department of Materials Science and Engineering, University of California, Irvine, CA 92697, USA*

<sup>3</sup> *Department of Chemistry, University of California, Irvine, CA 92697, USA*

<sup>4</sup> *Department of Physics and Astronomy, University of California, Irvine, CA 92697, USA*

<sup>5</sup> *Department of Chemical and Biomolecular Engineering, University of California, Irvine, CA 92697, USA*

### Contents

|                                                                                                  |     |
|--------------------------------------------------------------------------------------------------|-----|
| 1. Synthesis and purification of DNA-stabilized silver nanoclusters (Ag <sub>N</sub> -DNAs)..... | 2   |
| 2. Mass spectrometry.....                                                                        | 2   |
| 2.1 Molecular composition determination of Ag <sub>N</sub> -DNAs using mass spectrometry.....    | 3   |
| 2.2 Mass spectra of Ag <sub>N</sub> -DNAs.....                                                   | 4   |
| 3. Two photon spectra measurements of Ag <sub>N</sub> -DNAs.....                                 | 6-8 |
| 4. References .....                                                                              | 9   |

## 1. Synthesis and purification of DNA-stabilized silver nanoclusters (Ag<sub>N</sub>-DNAs).

A stoichiometric amount of AgNO<sub>3</sub> (Sigma Aldrich) was added to the ssDNA oligomer (Integrated DNA Technologies, standard desalting) in 10 mM ammonium acetate (pH 7.0) to form the Ag<sup>+</sup>-DNA complex. After 15 minutes, a freshly prepared aqueous solution of NaBH<sub>4</sub> ([BH<sub>4</sub><sup>-</sup>]/[Ag<sup>+</sup>] = 0.5) was added to the Ag<sup>+</sup>-DNA complex. Samples were stored at 4 °C in the dark for 3 to 5 days, allowing sufficient time for the Ag<sub>N</sub>-DNA formation, followed by purification using ion-paired reverse-phase high-performance liquid chromatography (RP-HPLC). The stoichiometry for Ag<sup>+</sup>:DNA was optimized for each Ag<sub>N</sub>-DNA to achieve maximum chemical yield (**Table S1**). No additional chloride source was added to synthesize chlorido-protected **Ag<sub>16</sub>-DNA-Cl<sub>2</sub>**.<sup>1</sup> The HPLC chromatograms of the four Ag<sub>N</sub>-DNA species are previously reported in Ref. 2.<sup>2</sup>

**Table S1.** The experimental conditions used for synthesis of Ag<sub>N</sub>-DNAs.

| Name                                      | [DNA]/ μM | [AgNO <sub>3</sub> ]/ μM |
|-------------------------------------------|-----------|--------------------------|
| <b>Ag<sub>15</sub>-DNA</b>                | 25        | 125                      |
| <b>Ag<sub>21</sub>-DNA</b>                | 20        | 100                      |
| <b>Ag<sub>16</sub>-DNA-Cl<sub>2</sub></b> | 25        | 187.5                    |
| <b>Ag<sub>19</sub>-DNA</b>                | 25        | 187.5                    |

## 2. Mass spectrometry

HPLC-purified Ag<sub>N</sub>-DNAs were solvent exchanged to 10 mM ammonium acetate (pH 7) and were directly injected at 100 μL/min in negative ion mode with a 2 kV capillary voltage, 30 V cone voltage, and no collision energy. Spectra were collected from 1000 to 4000 *m/z* and integrated for 1 s. Unless otherwise stated, the source and desolvation temperatures were 80 and 150 °C respectively. Gas flows were 45 L/h for the cone and 450 L/h for the desolvation. Samples were injected with 50 mM NH<sub>4</sub>OAc – MeOH (80:20) solution at pH 7.

## 2.1 Molecular composition determination of Ag<sub>N</sub>-DNAs using mass spectrometry.

HPLC-purified Ag<sub>N</sub>-DNAs were directly injected to obtain mass spectra using negative-ion mode electrospray ionization mass spectrometry (ESI-MS). The molecular composition of Ag<sub>N</sub>-DNA such as the number of ssDNA oligomers ( $n_s$ ) and the presence of additional chlorido ligands, total number of silver atoms ( $N$ ) were first determined. Then the number of effective valence electrons ( $N_0$ ) of each Ag<sub>N</sub>-DNA species was determined by fitting the calculated isotopic distribution of the Ag<sub>N</sub>-DNA to the experimental spectra. Detailed explanation formulae used for the calculation of  $N$  and  $N_0$  have been reported previously.<sup>1-3</sup> The molecular formula of Ag<sub>N</sub>-DNA is denoted as (DNA)<sub>ns</sub> (Ag<sub>N</sub>Cl<sub>x</sub>)<sup>Q<sub>c</sub></sup>, where  $Q_c$  is the nanocluster charge that matches the isotope pattern. In the absence of Cl<sup>-</sup> ligands,  $N_+$  equals  $Q_c$ , whereas, in the presence of Cl<sup>-</sup> ligands,  $Q_c = N_+ - x$ . The nanocluster size and charge were determined by fitting the calculated isotopic distribution of the Ag<sub>N</sub>-DNA to the experimental spectra. Calculated isotopic distributions were obtained from MassLynx using the chemical formula and corrected for the nanocluster's overall positive charge (oxidation state) cluster. The Ag<sub>N</sub>-DNA composition and charge were determined by fitting the calculated isotopic distribution of the Ag<sub>N</sub>-DNA to the experimental spectra. To confirm the overall charge of the nanocluster ( $Q_c$ ), we compared the best fit with the two observed charge states peaks,  $z = 4^-$  (dark blue curve) and  $z = 5^-$  (light blue curve) as shown in the insets of **Fig. S1** to **S4**.

## 2.2 Mass spectra of Ag<sub>N</sub>-DNAs.

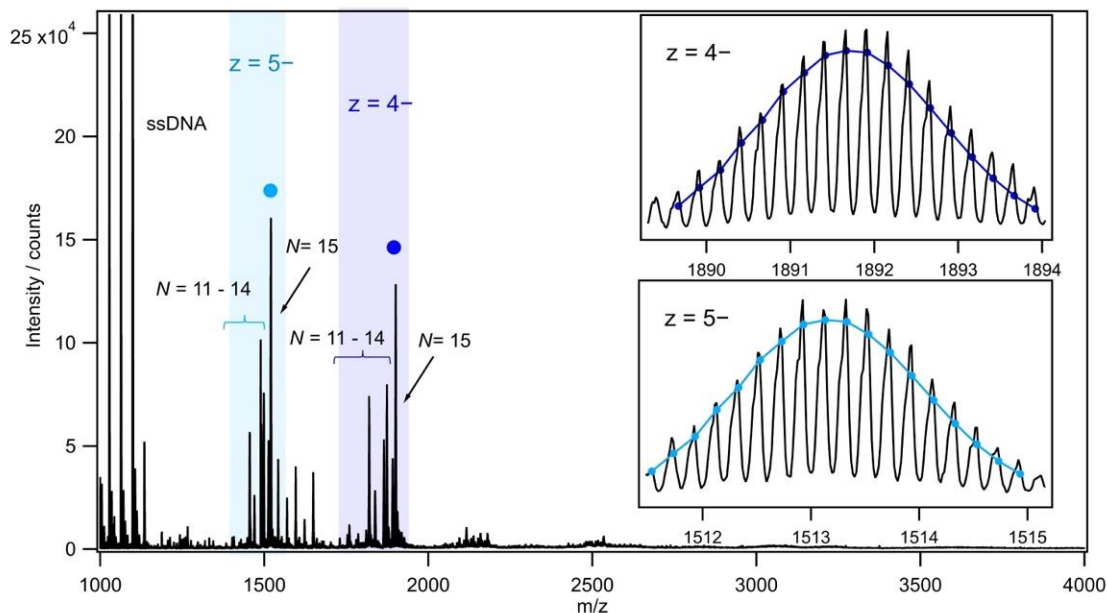

**Fig. S1** Mass spectra of **Ag<sub>15</sub>-DNA**. Experimental isotopic distributions (black curves) for all peaks of **Ag<sub>15</sub>-DNA** mass spectra. Insets show isotopic distributions aligned with experimental peaks for (DNA)<sub>2</sub>[Ag<sub>15</sub>]<sup>9+</sup> at  $z = 5^-$  (light blue) and  $z = 4^-$  (dark blue). Isotopic distributions were calculated using the chemical formula  $C_{192}H_{244}N_{78}O_{110}P_{18}Ag_{15}$ .

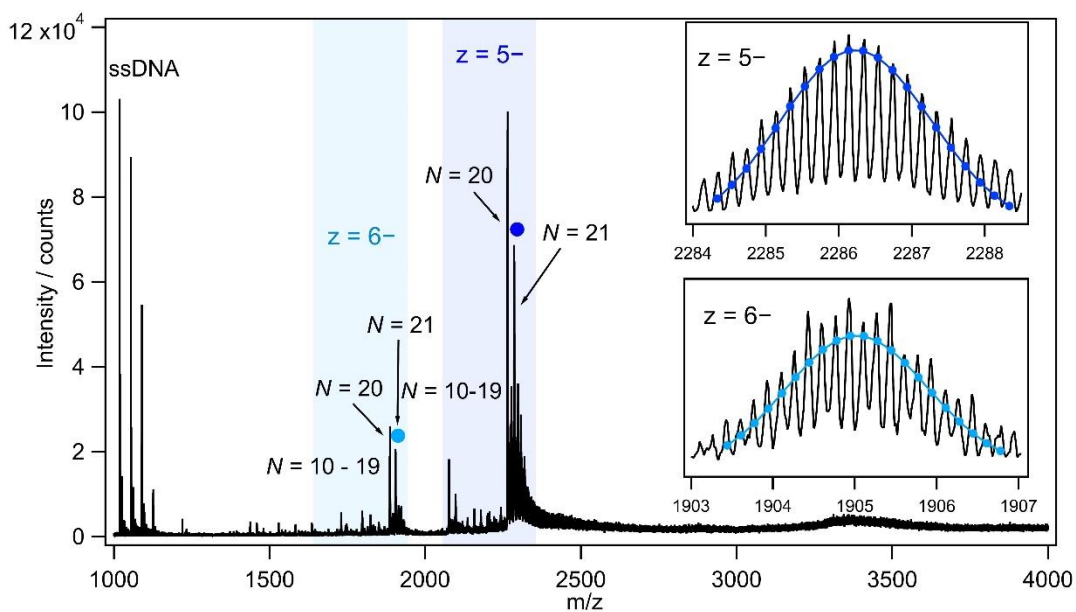

**Fig. S2** Mass spectra of **Ag<sub>21</sub>-DNA**. Experimental isotopic distributions (black curves) for all peaks of **Ag<sub>21</sub>-DNA** mass spectra. Insets show isotopic distributions aligned with experimental peaks for (DNA)<sub>3</sub>[Ag<sub>21</sub>]<sup>15+</sup> at  $z = 6^-$  (light blue) and  $z = 5^-$  (dark blue). Isotopic distributions were calculated using the chemical formula  $C_{291}H_{363}N_{132}O_{165}P_{27}Ag_{21}$ .

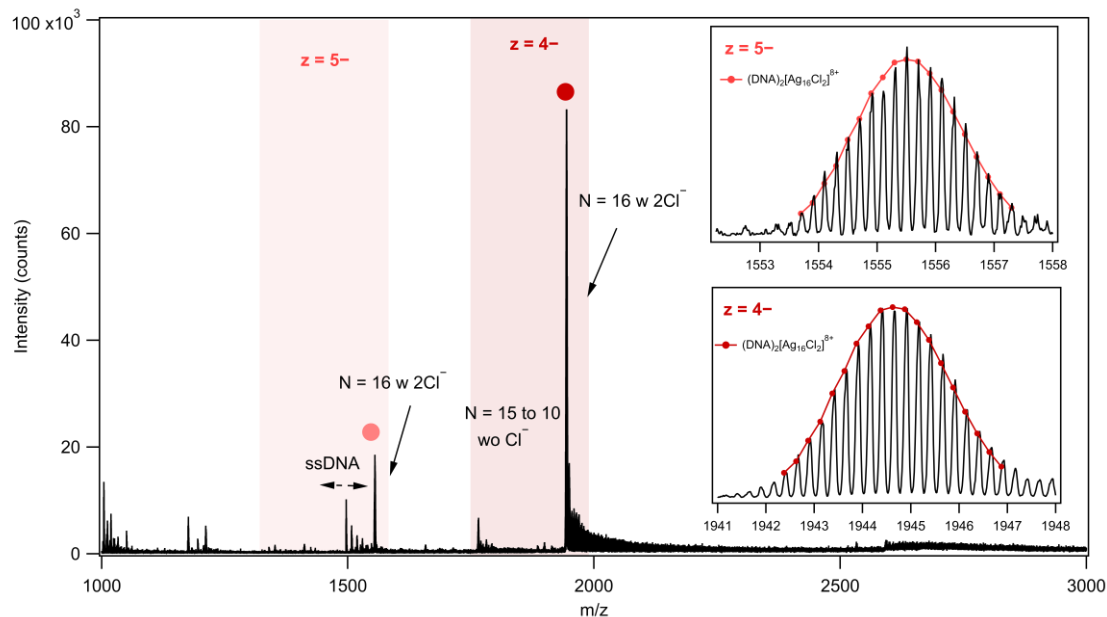

**Fig. S3** Mass spectra of **Ag<sub>16</sub>-DNA-Cl<sub>2</sub>**. Experimental isotopic distributions (black curves) for all peaks of **Ag<sub>16</sub>-DNA-Cl<sub>2</sub>** mass spectra. Insets show isotopic distributions aligned with experimental peaks for (DNA)<sub>2</sub>[Ag<sub>16</sub>Cl<sub>2</sub>]<sup>8+</sup> at z = 6- (light red) and z = 5- (dark red). Isotopic distributions were calculated using the chemical formula C<sub>192</sub>H<sub>244</sub>N<sub>78</sub>O<sub>112</sub>P<sub>18</sub>Cl<sub>2</sub>Ag<sub>16</sub>.

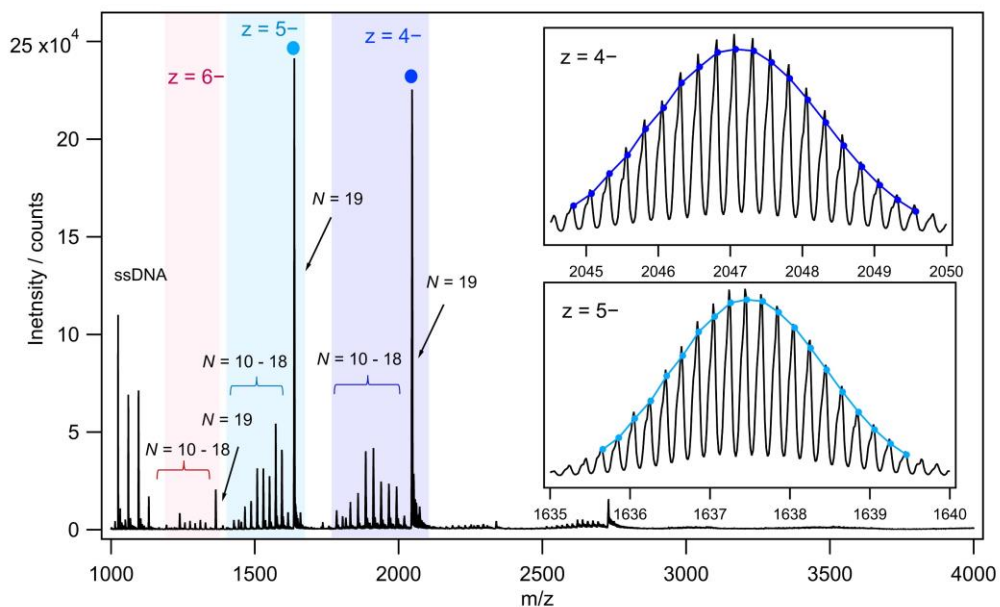

**Fig. S4** Mass spectra of **Ag<sub>19</sub>-DNA**. Experimental isotopic distributions (black curves) for peaks of **Ag<sub>19</sub>-DNA** mass spectra. Insets show isotopic distributions aligned with experimental peaks for (DNA)<sub>2</sub>[Ag<sub>19</sub>]<sup>11+</sup> at z = 5- (light blue) and z = 4- (dark blue), as indicated by circles. Isotopic distributions were calculated using the chemical formula C<sub>196</sub>H<sub>244</sub>N<sub>86</sub>O<sub>112</sub>P<sub>18</sub>Ag<sub>19</sub>.

### 3. Two-photon spectra measurements of Ag<sub>N</sub>-DNAs.

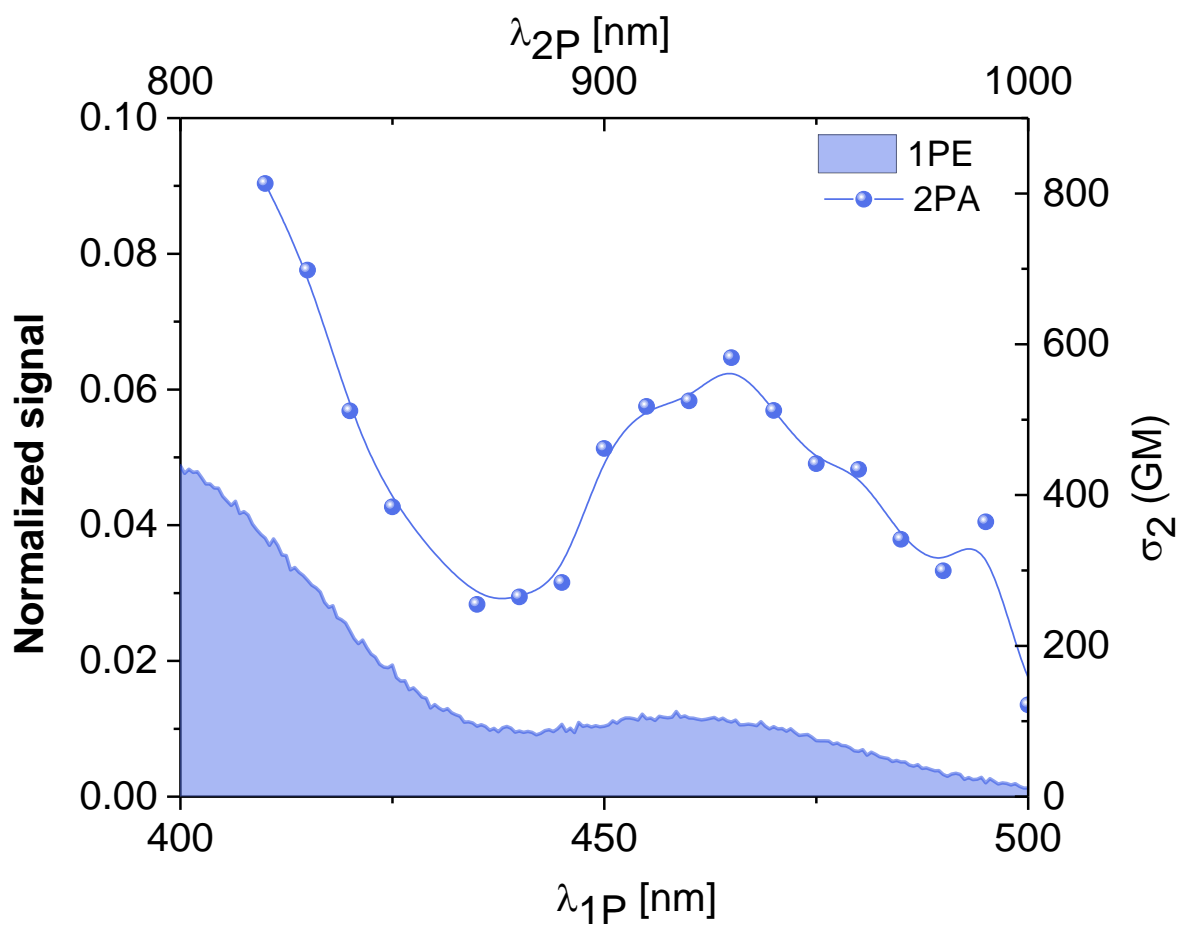

**Fig. S5** Zoomed-in comparison of one-photon excitation (1PE, filled blue band) and two-photon absorbance (2PA, blue circles and lines) for **Ag<sub>21</sub>-DNA**.

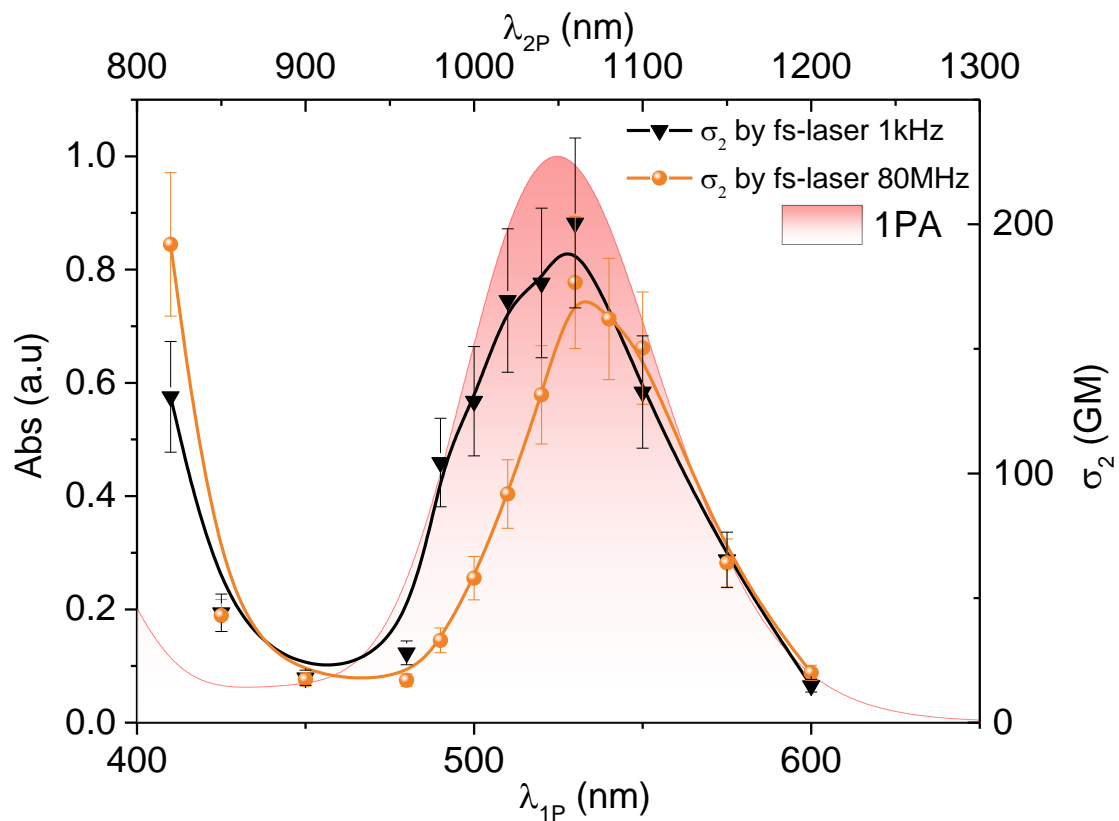

**Fig. S6** Comparison of one-photon excitation (1PE, filled red band) and two-photon absorption (2PA) spectra of **Ag<sub>16</sub>-DNA-Cl<sub>2</sub>** obtained with fs lasers at repetition rates of 1 kHz (black lines with inverted triangles) and 80 MHz (orange line with circles).

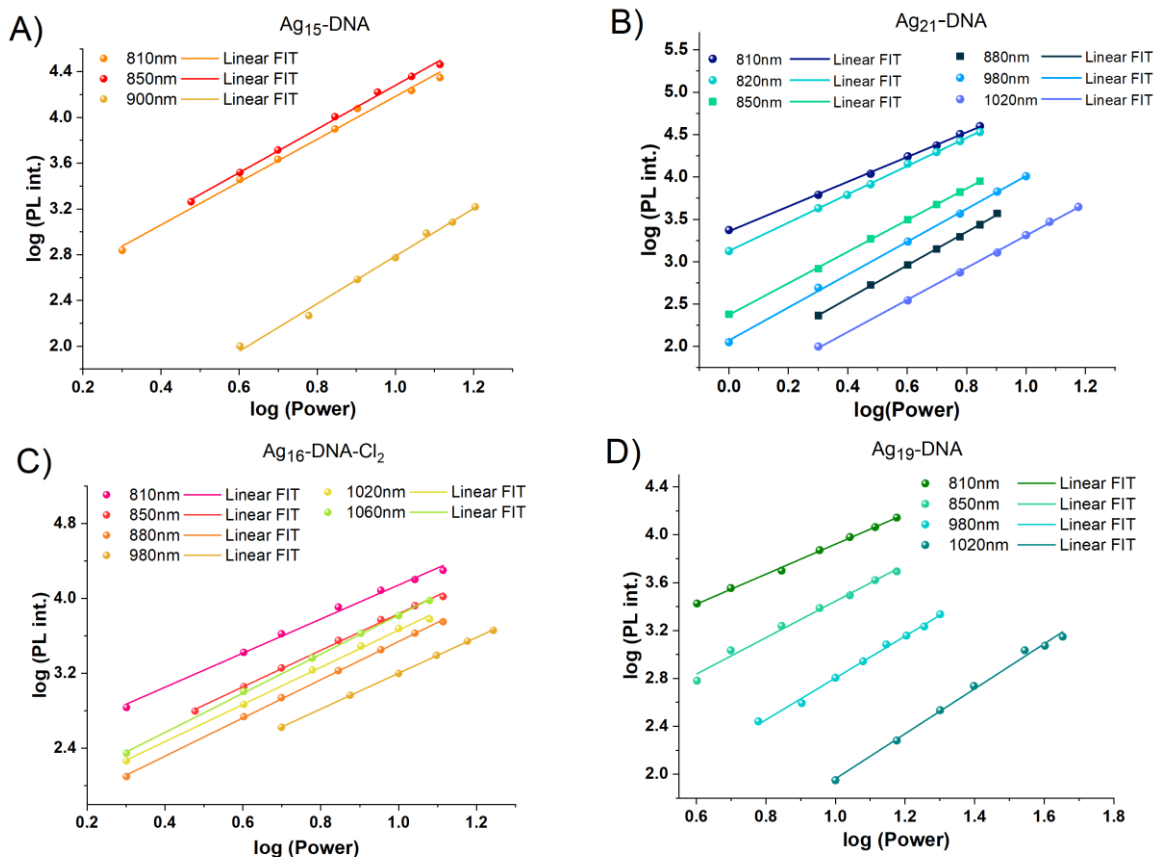

| Legend for Log-log plots of the PL intensity. Power exponent (n) is shown for all measured wavelengths. |                                                                                                                                                                                               |                                                                                                                                                                                                |                                                                                                                               |
|---------------------------------------------------------------------------------------------------------|-----------------------------------------------------------------------------------------------------------------------------------------------------------------------------------------------|------------------------------------------------------------------------------------------------------------------------------------------------------------------------------------------------|-------------------------------------------------------------------------------------------------------------------------------|
| Ag <sub>15</sub> -DNA                                                                                   | Ag <sub>21</sub> -DNA                                                                                                                                                                         | Ag <sub>16</sub> -DNA-Cl <sub>2</sub>                                                                                                                                                          | Ag <sub>19</sub> -DNA                                                                                                         |
| n <sub>810</sub> : 1.87±0.07<br>n <sub>850</sub> : 1.91±0.04<br>n <sub>900</sub> : 2.08±0.07            | n <sub>810</sub> : 1.48±0.02<br>n <sub>820</sub> : 1.67±0.02<br>n <sub>850</sub> : 1.86±0.01<br>n <sub>880</sub> : 1.97±0.02<br>n <sub>980</sub> : 2.07±0.07<br>n <sub>1020</sub> : 1.90±0.01 | n <sub>810</sub> : 1.82±0.06<br>n <sub>850</sub> : 1.95±0.04<br>n <sub>880</sub> : 2.04±0.02<br>n <sub>980</sub> : 1.91±0.01<br>n <sub>1020</sub> : 1.98±0.04<br>n <sub>1060</sub> : 2.09±0.02 | n <sub>810</sub> : 1.19±0.02<br>n <sub>850</sub> : 1.52±0.07<br>n <sub>980</sub> : 1.75±0.04<br>n <sub>1020</sub> : 1.88±0.06 |

**Fig. S7** Log-log plot of the PL intensity of (A) **Ag<sub>15</sub>-DNA**, (B) **Ag<sub>21</sub>-DNA**, (C) **Ag<sub>16</sub>-DNA-Cl<sub>2</sub>**, and (D) **Ag<sub>19</sub>-DNA**. Slopes indicate power exponent (n).



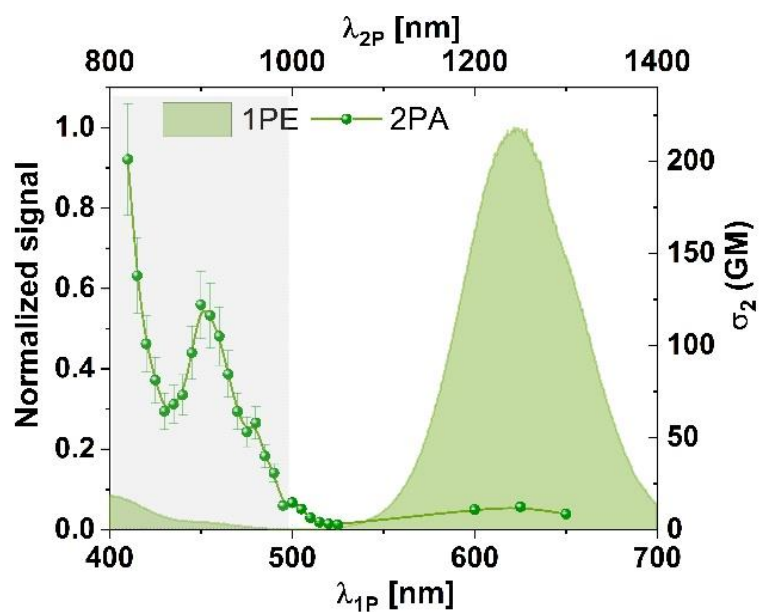

**Fig. S8** Comparison between one-photon excitation (1PE, filled bands) and two-photon absorption (2PA, points and lines) of **Ag<sub>19</sub>-DNA**. Grey shaded area implies a high contribution of one-photon processes based on power exponent.

#### 4. References

1. A. González-Rosell, S. Malola, R. Guha, N. R. Arevalos, M. F. Matus, M. E. Goulet, E. Haapaniemi, B. B. Katz, T. Vosch, J. Kondo, H. Häkkinen and S. M. Copp, *J. Am. Chem. Soc.*, 2023, **145**, 10721-10729.
2. R. Guha, A. González-Rosell, M. Rafik, N. Arevalos, B. B. Katz and S. M. Copp, *Chem. Sci.*, 2023, **14**, 11340-11350.
3. R. Guha, S. Malola, M. Rafik, M. Khatun, A. González-Rosell, H. Häkkinen and S. M. Copp, *Nanoscale*, 2024, DOI: 10.1039/D4NR03533J.
